# Supplementary material
Source: publisher figshare collection journal article supplement (https://acs.figshare.com/ndownloader/files/4071358)
Supplement: Supplementary file 1 [file 4071358]

# Unmodified Fetuin Glycans

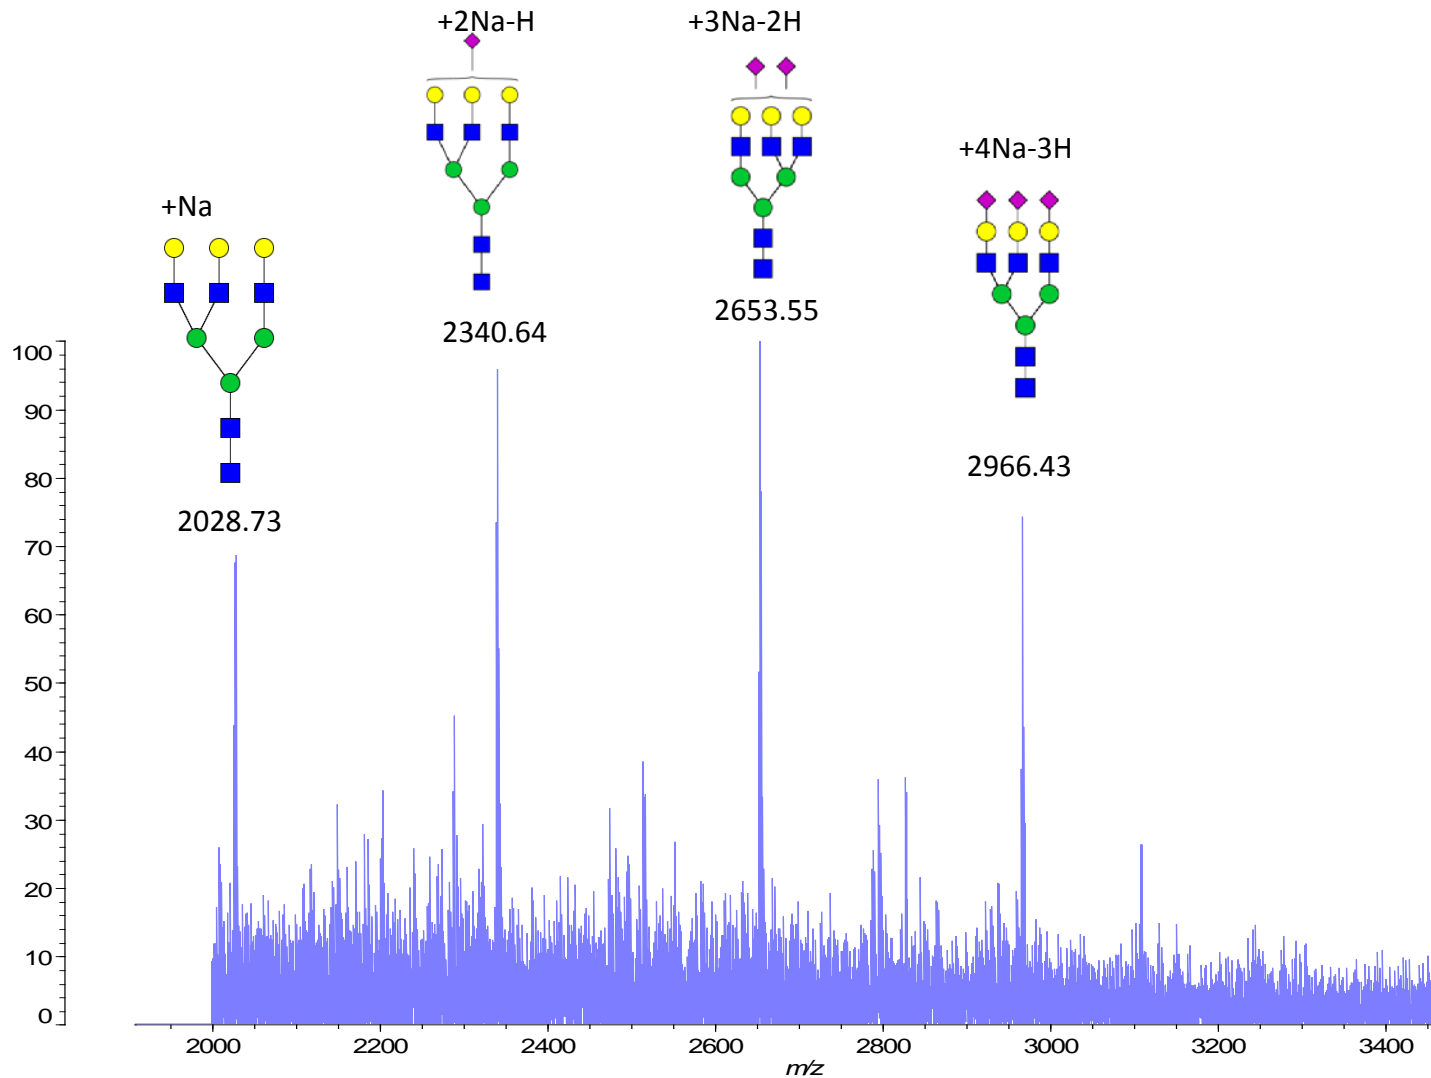

Mass spectrum from Shimadzu AXIMA Resonance MALDI Mass spectrometer of N-glycans from bovine fetuin. Glycans were analyzed in DHB/DMA matrix by positive ion mode. 1000 shots were acquired. Glycoworkbench was used for cartoons of the most plausible structure based on accurate mass. In the above figure blue square is GlcNAc, green circle is mannose, yellow circle is galactose, red triangle is fucose and pink diamond is sialic acid.

# Acetohydrazide Modified Fetuin Glycans

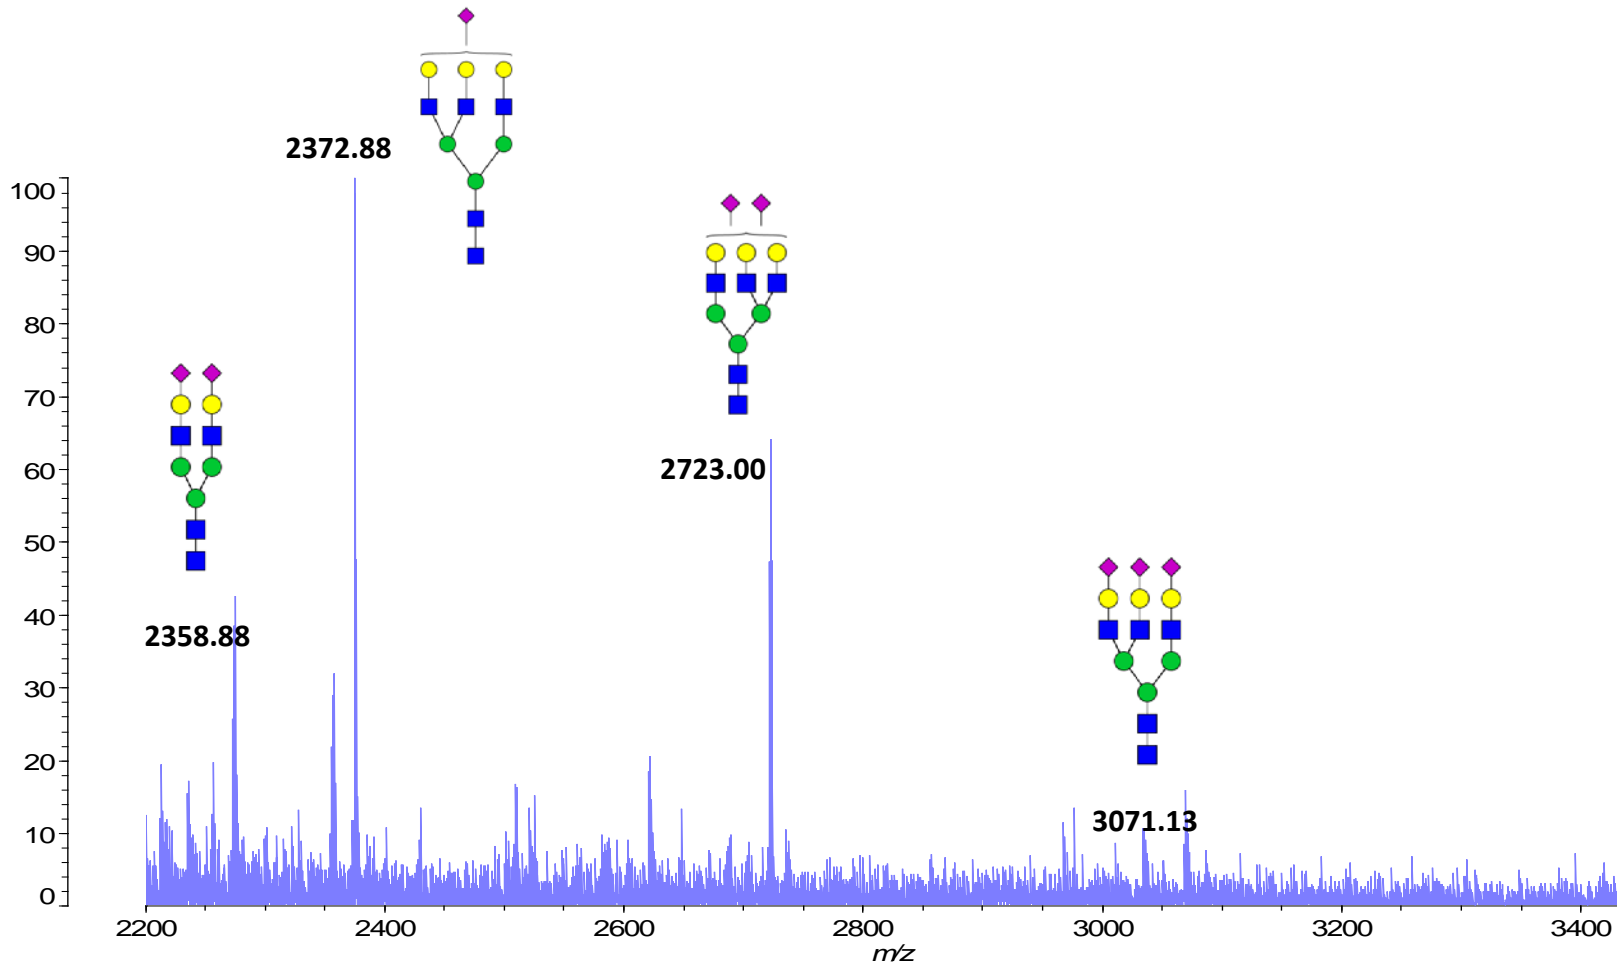

Mass spectrum from Shimadzu AXIMA Resonance MALDI Mass spectrometer of N-glycans from bovine fetuin. Sialic acids of N-glycans were amidated with acetohydrazide in presence of EDC. Glycans were analyzed in DHB/DMA matrix by positive ion mode. 1000 shots were acquired. Glycoworkbench was used for cartoons of the most plausible structure based on accurate mass. In the above figure blue square is GlcNAc, green circle is mannose, yellow circle is galactose and pink diamond is acetohydrazide modified sialic acid.

# Aniline Modified Fetuin

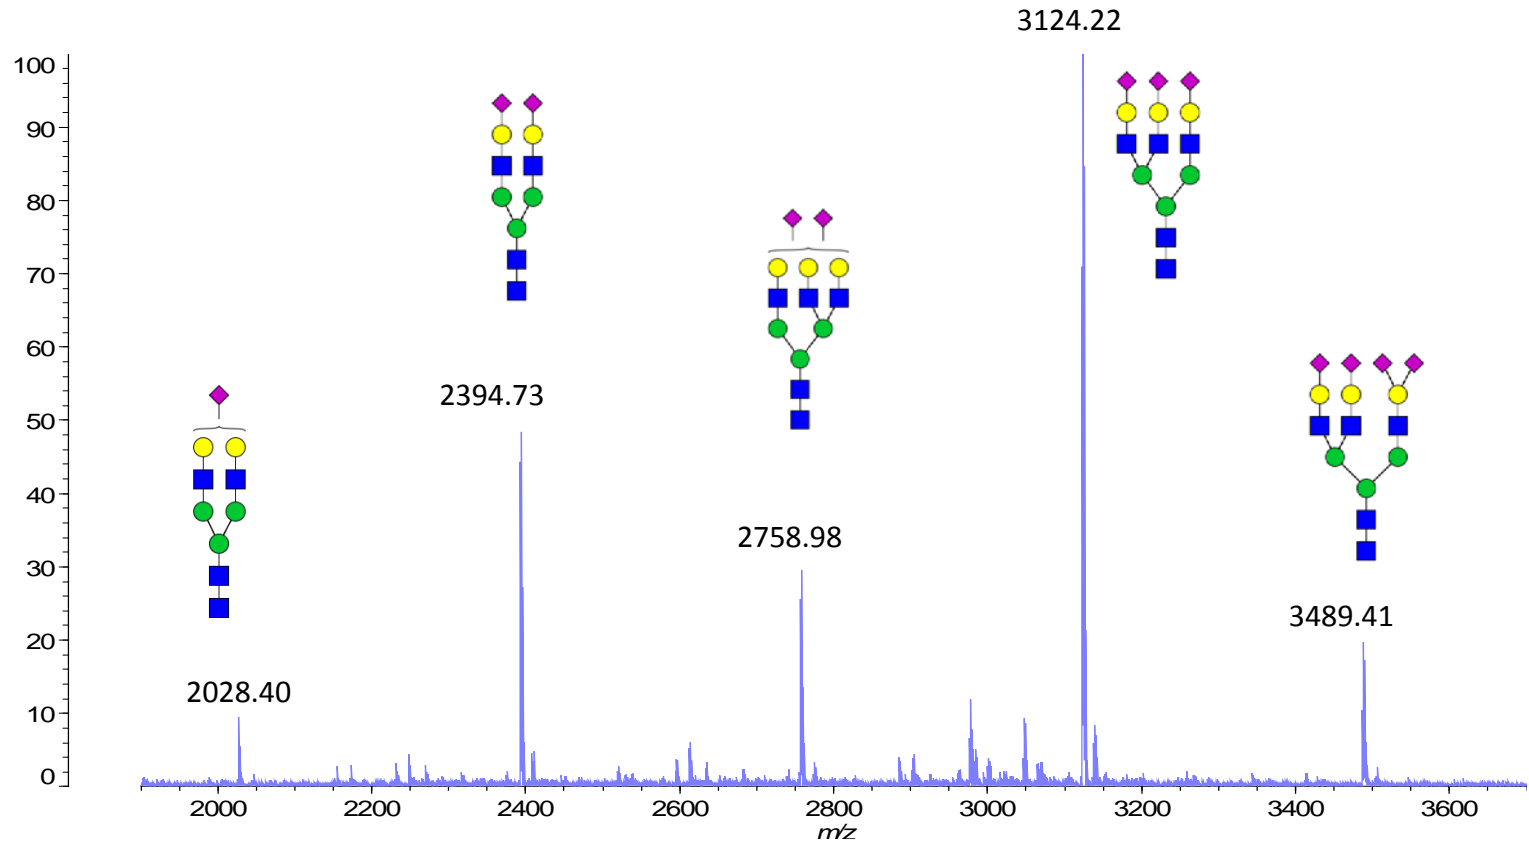

Mass spectrum from Shimadzu AXIMA Resonance MALDI Mass spectrometer of N-glycans from bovine fetuin. Sialic acids of N-glycans were amidated with Aniline in presence of EDC. Glycans were analyzed in DHB/DMA matrix by positive ion mode. 1000 shots were acquired. Glycoworkbench was used for cartoons of the most plausible structure based on accurate mass. In the above figure blue square is GlcNAc, green circle is mannose, yellow circle is galactose and pink diamond is aniline modified sialic acid.
